# Supplementary material for: Treelike polymeric phosphate esters grafted onto graphene oxide and its tribological properties in polyalkylene glycol for steel/steel contact at elevated temperature
Source: Royal Society of Chemistry journal article supplement (doi:10.1039/c6ra06919c), 2016-01-01
Supplement: c6ra06919c1.pdf [file c6ra06919c1.pdf]

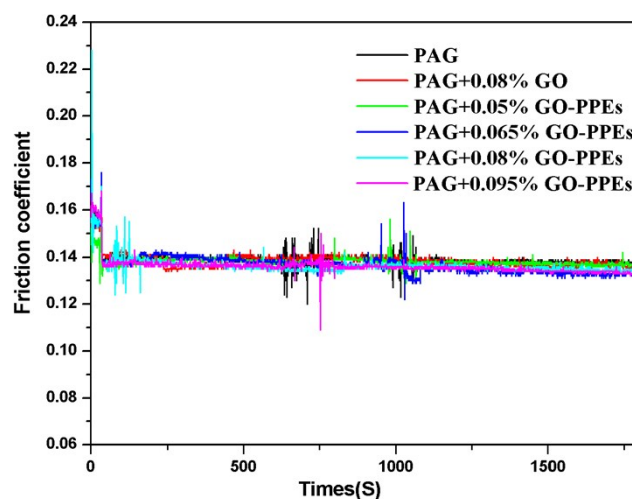

**Fig. S1** Friction coefficient of the discs lubricated by PAG, 0.08% GO and PAG with different concentrations of GO-PPEs composites at 25 °C (SRV load, 25 N; stroke, 1 mm; frequency, 25 Hz).
